# Supplementary material for: Pseudobulbar Affect Correlates With Mood Symptoms in Parkinsonian Disorders but Not Amyotrophic Lateral Sclerosis
Source: Atypon-hosted journal article supplement (doi:10.1176/appi.neuropsych.17070131), 2018-03-05
Supplement: appi.neuropsych.17070131.ds001.pdf [file appi.neuropsych.17070131.ds001.pdf]

Supplemental Table 1. Clinical group comparisons on outcome variables

|               | <b>PD vs. aP</b>     | <b>PD vs. ALS</b>    | <b>aP vs. ALS</b>    |
|---------------|----------------------|----------------------|----------------------|
|               | <i>q<sub>s</sub></i> | <i>q<sub>s</sub></i> | <i>q<sub>s</sub></i> |
|               | <i>p</i>             | <i>p</i>             | <i>p</i>             |
|               | <i>g</i>             | <i>g</i>             | <i>g</i>             |
| MoCA          | 3.72                 | 1.59                 | -2.12                |
| (Total Score) | 0.001                | 0.25                 | 0.15                 |
|               | 0.85                 | 0.42                 | 0.49                 |
| MoCA          | 0.54                 | 0.48                 | -0.05                |
| (Z Score)     | 0.18                 | 0.27                 | 0.98                 |
|               | 0.47                 | 0.40                 | 0.04                 |
| BDI-II        | -3.47                | -0.14                | 3.33                 |
|               | 0.17                 | 0.99                 | 0.30                 |
|               | 0.39                 | 0.02                 | 0.47                 |
| STAI          | -1.50                | 0.56                 | 2.05                 |
|               | 0.788                | 0.97                 | 0.72                 |
|               | 0.14                 | 0.06                 | 0.23                 |
| AES-S         | 4.36                 | 0.80                 | -3.57                |
|               | 0.05                 | 0.91                 | 0.23                 |
|               | 0.54                 | 0.11                 | 0.39                 |
| AES-O         | 6.37                 | 4.65                 | -1.72                |
|               | 0.04                 | 0.20                 | 0.83                 |
|               | 0.98                 | 0.52                 | 0.15                 |
| SF-36 PF      | 12.09                | 14.34                | 2.27                 |
|               | 0.001                | <0.001               | 0.82                 |

|          |        |        |       |
|----------|--------|--------|-------|
|          | 0.89   | 1.07   | 0.16  |
| SF-36 RP | 13.00  | 11.84  | -1.16 |
|          | <0.001 | <0.001 | 0.93  |
|          | 1.09   | 0.94   | 0.09  |
| SF-36 BP | -2.82  | -1.82  | 1.00  |
|          | 0.55   | 0.80   | 0.95  |
|          | 0.23   | 0.16   | 0.09  |
| SF-36 GH | 8.47   | 9.38   | 0.91  |
|          | 0.001  | 0.001  | 0.94  |
|          | 0.86   | 1.03   | 0.09  |
| SF-36 VT | 5.36   | 4.12   | -1.23 |
|          | 0.09   | 0.26   | 0.91  |
|          | 0.49   | 0.41   | 0.10  |
| SF-36 SF | 3.26   | 9.34   | 6.08  |
|          | 0.56   | 0.02   | 0.23  |
|          | 0.23   | 1.59   | 0.45  |
| SF-36 RE | 7.18   | 8.87   | 1.70  |
|          | 0.18   | 0.09   | 0.93  |
|          | 0.42   | 0.49   | 0.10  |
| SF-36 MH | 3.58   | 1.22   | -2.36 |
|          | 0.25   | 0.86   | 0.64  |
|          | 0.35   | 0.14   | 0.23  |

Note:  $q_s$  = Tukey's HSD;  $g$  = Hedge's  $g$ ; MoCA = Montreal Cognitive Assessment; BDI-II = Beck Depression Inventory, 2<sup>nd</sup> Edition; STAI = State-Trait Anxiety Inventory, Trait Only; AES = Apathy Evaluation Scale, Self and Other; SF-36 = 36 Item Short-Form Survey; PF = Physical Functioning; RP = Role-Physical; BP = Bodily Pain; GH = General Health; VT = Vitality; SF = Social Functioning; RE = Role-Emotional; MH = Mental Health
